# Supplementary material for: Biologics for psoriasis patients under 18 years of age: Real-world evidence from the Chinese psoriasis real world evidence research group
Source: Frontiers journal article supplement (doi:10.3389/fmed.2022.1009991), 2022-09-07
Supplement: Table_1.pdf [file Table_1.pdf]

**Table S1** Demographic information and treatment information for each child with psoriasis

| Patient | Type   | Gender | Age | Age of Onset | Baseline PASI | Previous Treatment       | Start Treatment of the Study | Adverse Events                                     | Switching of Biologics             | Reached 52 Weeks |
|---------|--------|--------|-----|--------------|---------------|--------------------------|------------------------------|----------------------------------------------------|------------------------------------|------------------|
| 1       | Plaque | F      | 17  | 11           | 15            |                          | Adalimumab                   | No                                                 | Switched to Secukinumab at week 28 | Yes              |
| 2       | Plaque | M      | 16  | 13           | 9.8           |                          | Adalimumab                   | No                                                 |                                    | Yes              |
| 3       | Plaque | F      | 10  | 7            | 12.6          |                          | Adalimumab                   | No                                                 |                                    | Yes              |
| 4       | Plaque | M      | 15  | 12           | 3.2           | Acitretin, Etanercept    | Adalimumab                   | No                                                 | Switched to Secukinumab at week 64 | Yes              |
| 5       | Plaque | M      | 13  | 8            | 15.9          |                          | Adalimumab                   | Upper respiratory infection                        |                                    | Yes              |
| 6       | Plaque | F      | 14  | 13           | 2.7           | Tripterygium wilfordii   | Adalimumab                   | No                                                 | Switched to Secukinumab at week 64 | Yes              |
| 7       | Plaque | M      | 12  | 9            | 15            | Methotrexate, Etanercept | Adalimumab                   | No                                                 |                                    | Yes              |
| 8       | Plaque | M      | 17  | 17           | 12            |                          | Adalimumab                   | No                                                 |                                    | Yes              |
| 9       | Plaque | F      | 6   | 4            | 11.1          |                          | Adalimumab                   | No                                                 |                                    | Yes              |
| 10      | Plaque | F      | 10  | 9            | 22            |                          | Adalimumab                   | No                                                 |                                    | Yes              |
| 11      | Plaque | M      | 17  | 15           | 7.4           |                          | Adalimumab                   | No                                                 |                                    | No               |
| 12      | Nail   | M      | 9   | 7            | 48 (NAPSI)    |                          | Adalimumab                   | Upper respiratory infection                        | Switched to Secukinumab at week 24 | Yes              |
| 13      | Plaque | F      | 7   | 4            | 22.4          | Adalimumab               | Secukinumab                  | No                                                 |                                    | Yes              |
| 14      | Plaque | M      | 17  | 13           | 18.6          |                          | Secukinumab                  | No                                                 |                                    | Yes              |
| 15      | Plaque | M      | 16  | 13           | 24.8          |                          | Secukinumab                  | Upper respiratory infection, skin fungal infection |                                    | Yes              |
| 16      | Plaque | M      | 15  | 9            | 35            |                          | Secukinumab                  | No                                                 |                                    | Yes              |
| 17      | Plaque | M      | 17  | 3            | 12            |                          | Secukinumab                  | No                                                 |                                    | No               |

|    |          |   |    |    |      |                       |             |                    |     |
|----|----------|---|----|----|------|-----------------------|-------------|--------------------|-----|
| 18 | Plaque   | M | 17 | 8  | 7.2  |                       | Secukinumab | No                 | Yes |
| 19 | Plaque   | F | 9  | 5  | 12   |                       | Secukinumab | No                 | Yes |
| 20 | Plaque   | M | 16 | 13 | 23.5 |                       | Secukinumab | No                 | Yes |
| 21 | Plaque   | F | 8  | 6  | 25   |                       | Secukinumab | No                 | Yes |
| 22 | Plaque   | M | 8  | 7  | 25   |                       | Secukinumab | No                 | No  |
| 23 | Plaque   | F | 8  | 5  | 17   |                       | Secukinumab | No                 | No  |
| 24 | Plaque   | F | 13 | 3  | 22.5 |                       | Secukinumab | No                 | No  |
| 25 | Plaque   | F | 10 | 10 | 8    |                       | Secukinumab | No                 | No  |
| 26 | Plaque   | M | 17 | 5  | 7    |                       | Secukinumab | No                 | No  |
| 27 | Plaque   | F | 5  | 5  | 2.5  |                       | Secukinumab | No                 | No  |
| 28 | Plaque   | M | 13 | 5  | 21   |                       | Secukinumab | No                 | No  |
| 29 | Plaque   | F | 16 | 12 | 12   |                       | Secukinumab | Cutaneous pruritus | No  |
| 30 | Plaque   | F | 17 | 15 | 10   |                       | Secukinumab | No                 | No  |
| 31 | Plaque   | M | 13 | 7  | 4.2  | Acitretin             | Secukinumab | No                 | No  |
| 32 | Plaque   | F | 11 | 8  | 12   |                       | Secukinumab | No                 | No  |
| 33 | Plaque   | F | 7  | 5  | 10.2 |                       | Secukinumab | No                 | No  |
| 34 | Plaque   | F | 3  | 2  | 38.1 |                       | Secukinumab | No                 | No  |
| 35 | Plaque   | F | 17 | 15 | 20   | Acitretin, Adalimumab | Ixekizumab  | No                 | Yes |
| 36 | Pustular | M | 11 | 8  | 23   |                       | Ixekizumab  | No                 | Yes |
| 37 | Plaque   | M | 14 | 4  | 27.2 | Acitretin             | Ixekizumab  | No                 | Yes |
| 38 | Plaque   | M | 17 | 11 | 6.7  |                       | Ixekizumab  | No                 | No  |
